# Supplementary material for: Quantitative chemical imaging of breast calcifications in association with neoplastic processes
Source: PubMed Central journal article supplement (PMC7254998; doi:10.7150/thno.43325), 2020-04-27
Supplement: thnov10p5865s1.pdf [file thnov10p5865s1.pdf]

# **Quantitative chemical imaging of breast calcifications in association with neoplastic processes**

Kseniya S. Shin<sup>1,2</sup>, Mint Laohajaratsang<sup>1</sup>, Shuaiqian Men<sup>1</sup>, Benjamin Figueroa<sup>1</sup>, Suzanne M. Dintzis<sup>3</sup>, Dan Fu<sup>1,\*</sup>

<sup>1</sup>Department of Chemistry, University of Washington, Seattle, 98195-1700, USA

<sup>2</sup>School of Medicine, University of Washington, Seattle, 98195-1700, USA

<sup>3</sup>Department of Pathology, University of Washington, Seattle, 98195-1700, USA

[\\*danfu@uw.edu](mailto:danfu@uw.edu)

## SUPPLEMENTARY MATERIAL

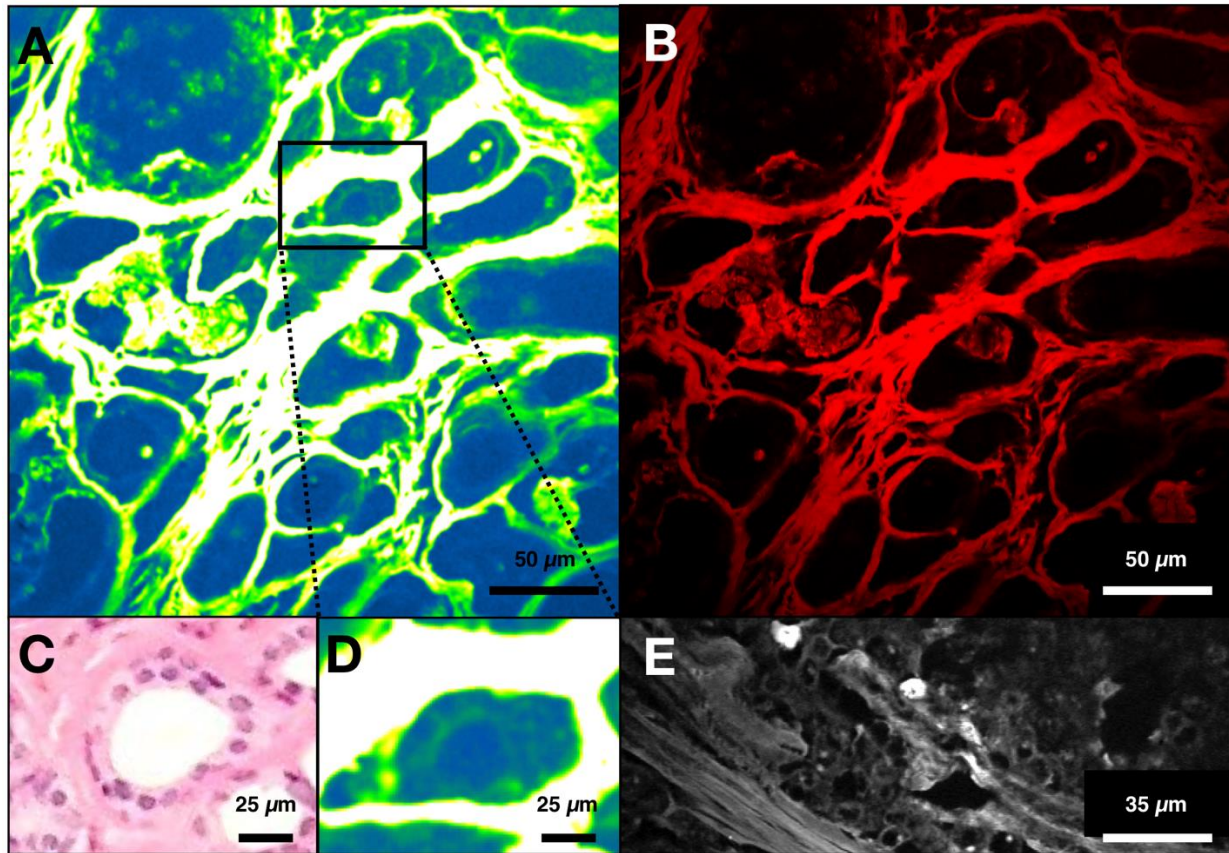

Supplementary Figure 1: Visualizing cellular material in presence of strong CH signal from stromal collagen. A) Adenosis case presented in Figure 3 of main manuscript with adjusted intensity and color scale to assist with visualizing cellular material. B) Adenosis case as presented in Figure 3 of main manuscript. C) A close up of a duct on H&E. D) A close up of a duct from image in A). E) Additional example with easier to visualize cellular material (DCIS case).

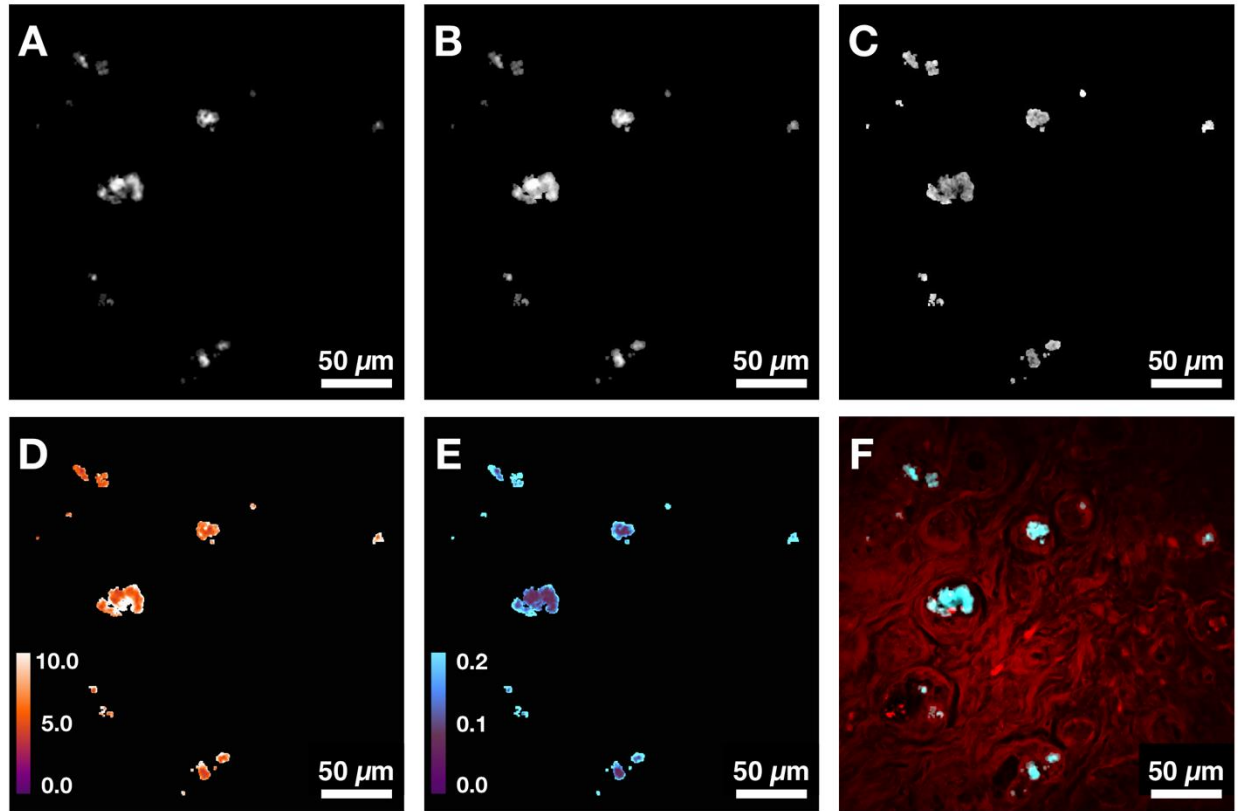

Supplementary Figure 2: Correlating images at phosphate, carbonate, and phenylalanine Raman transitions to resulting carbonate content % and phenylalanine to phosphate ratio maps (calcifications associated with benign process). A) Image at phosphate Raman transition ( $\sim 960\text{ cm}^{-1}$ ). B) Image at carbonate Raman transition ( $\sim 1070\text{ cm}^{-1}$ ). C) Image at phenylalanine Raman transition ( $\sim 1005\text{ cm}^{-1}$ ). D) Carbonate content % map. E) Phenylalanine to phosphate ratio map. F) Image at CH Raman transition (red) together with image at phosphate Raman transition (cyan) to highlight calcification presence in tissue.

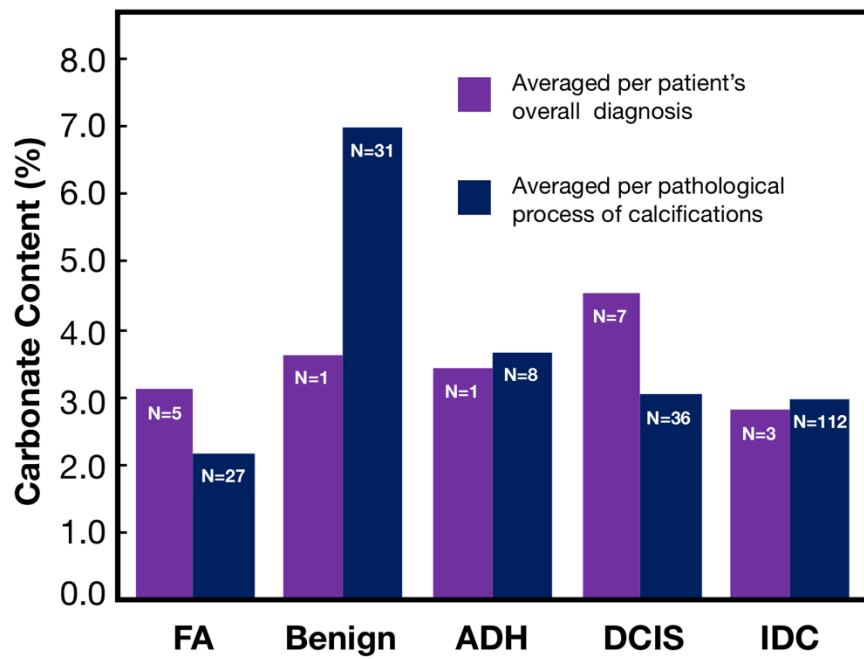

Supplementary Figure 3: Comparing the averages for carbonate content % as calculated per patient's overall diagnosis *versus* per pathological process of calcifications.

| Patient                                                 | Sex | Age | Specimen type         | Overall diagnosis | Number of calcifications associated with specified pathology |          |           |            |           | Total number of calcifications per patient | Carbonate content % per patient |
|---------------------------------------------------------|-----|-----|-----------------------|-------------------|--------------------------------------------------------------|----------|-----------|------------|-----------|--------------------------------------------|---------------------------------|
|                                                         |     |     |                       |                   | Benign                                                       | ADH      | DCIS      | IDC        | FA        |                                            |                                 |
| 1                                                       | F   | 75  | Excisional biopsy     | FA                | 0                                                            | 0        | 0         | 0          | 9         | 9                                          | 2.3±1.1                         |
| 2                                                       | F   | 64  | Needle core biopsy    | FA                | 0                                                            | 0        | 0         | 0          | 11        | 11                                         | 2.4±0.8                         |
| 3                                                       | F   | 49  | Needle core biopsy    | DCIS              | 0                                                            | 0        | 8         | 0          | 0         | 8                                          | 4.4±1.8                         |
| 4                                                       | F   | 56  | Needle core biopsy    | DCIS              | 0                                                            | 0        | 1         | 0          | 0         | 1                                          | 3.5                             |
| 5                                                       | F   | 57  | Needle core biopsy    | DCIS              | 0                                                            | 0        | 4         | 0          | 0         | 4                                          | 3.5±0.5                         |
| 6                                                       | F   | 58  | Excision              | ADH               | 0                                                            | 3        | 0         | 0          | 0         | 3                                          | 3.4±0.5                         |
| 7                                                       | F   | 51  | Excision              | DCIS              | 0                                                            | 3        | 0         | 0          | 0         | 3                                          | 3.9±0.3                         |
| 8                                                       | F   | 60  | Needle core biopsy    | DCIS              | 3                                                            | 0        | 0         | 0          | 0         | 3                                          | 7.7±0.3                         |
| 9                                                       | F   | 40  | Needle core biopsy    | DCIS              | 1                                                            | 2        | 0         | 0          | 0         | 3                                          | 5.7±3.9                         |
| 10                                                      | F   | 59  | Needle core biopsy    | FA                | 0                                                            | 0        | 0         | 0          | 4         | 4                                          | 1.6±0.6                         |
| 11                                                      | F   | 57  | Needle core biopsy    | FA                | 18                                                           | 0        | 0         | 0          | 0         | 18                                         | 6.4±1.6                         |
| 12                                                      | F   | 51  | Excision              | Adenosis          | 7                                                            | 0        | 0         | 0          | 0         | 7                                          | 3.6±0.8                         |
| 13                                                      | F   | 60  | Needle core biopsy    | DCIS              | 2                                                            | 0        | 19        | 0          | 0         | 21                                         | 3.8±1.2                         |
| 14                                                      | F   | 56  | Unilateral mastectomy | IDC               | 0                                                            | 0        | 1         | 76         | 0         | 77                                         | 2.3±0.7                         |
| 15                                                      | F   | 68  | Lumpectomy            | IDC               | 0                                                            | 0        | 0         | 11         | 0         | 11                                         | 3.6±1.1                         |
| 16                                                      | F   | 56  | Unilateral mastectomy | IDC               | 0                                                            | 0        | 3         | 25         | 0         | 28                                         | 2.5±0.8                         |
| 17                                                      | F   | 32  | Lumpectomy            | FA                | 0                                                            | 0        | 0         | 0          | 3         | 3                                          | 2.9±0.8                         |
| <b>Total number of calcifications per each category</b> |     |     |                       |                   | <b>31</b>                                                    | <b>8</b> | <b>36</b> | <b>112</b> | <b>27</b> |                                            |                                 |

Supplementary Table 1: A patient clinical history summary together with detailed account of calcification number in each category. Carbonate content % average for each patient is provided.

| Categories Compared                 | Two-sample T-test P-value |                               |
|-------------------------------------|---------------------------|-------------------------------|
|                                     | Carbonate Content %       | Phenylalanine/Phosphate Ratio |
| Benign <i>versus</i> DCIS           | < 0.001                   | 0.013                         |
| Benign <i>versus</i> ADH            | < 0.001                   | < 0.001                       |
| Benign <i>versus</i> IDC            | < 0.001                   | < 0.001                       |
| Benign <i>versus</i> FA             | < 0.001                   | < 0.001                       |
| DCIS <i>versus</i> IDC              | < 0.001                   | 0.002                         |
| ADH <i>versus</i> DCIS              | 0.059                     | 0.021                         |
| Benign <i>versus</i> all neoplastic | < 0.001                   | < 0.001                       |
| FA <i>versus</i> IDC                | 0.395                     | 0.001                         |

Supplementary Table 2: Summary of t-test p-values for various categories compared (for both carbonate content % and phenylalanine/phosphate ratio). P-value of <0.005 is considered statistically significant and P-value of <0.001 is considered statistically highly significant.
